# Supplementary material
Source: publisher figshare collection journal article supplement (https://gsapubs.figshare.com/ndownloader/files/38829930)
Supplement: Supplementary file 1 [file 38829930]

## Sheet: Table DR2
Table DR2: Whole-rock trace elements for samples from the San Gabriel pluton (LA-ICP-MS data)
Unit		Los Espolones qtz-monzodiorite					Los Piques qtz-monzonite																Los Rodados monzogranite					Mafic Enclaves				Leucogranitic dykes
Sample		SG2001	SG2307	SG2310	SG1903		SG0101	SG0702	SG1301	SG1501	SG2311	SG2401	SG0702	SG1203	SG1601	SG2512	SG2607	SG1801	SG2108	SG2504	SG2304		SG0901	SG2202	SG2205	SG2601		SG2104	SG2308	SG2107		SG2204D	SG0901A	SG2402D
N (*)		6262374	6262352	6262303	6252698		6255021	6259800	6260878	6253607	6262112	6257529	6259800	6263308	6254635	6262596	6258806	6258305	6254386	6261905	6262253		6261582	6257224	6257254	6258674		6254446	6262371	6254386		6252703	6261587	6257534
E (*)		385897	385788	385756	388592		387622	388280	387417	388953	385829	389740	388280	384903	388159	386659	389208	386875	387493	386579	385864		386309	386518	386545	388247		387504	385701	387493		388592	386309	389740
H m.a.s.l. (**)		2031	1885	1819	1705		1549	1410	1304	1497	1727	1512	1410	1873	1425	2128	1802	1430	1600	1627	1825		1406	1480	1428	1475		1506	1885	1600		1705	1406	1512
Trace elements ppm
Li6		511559	502007	480320	511478		459574	464597	487592	495352	444954	499638	508055	469798	497643	433785	486546	440541	414943	512953	504872		492247	478296	448739	490883		430980	507255	506824		514880	1.3838e+06	501407
Na23		30224.1	29099	26128.2	29935		32589.9	32460.6	32412.7	31825.6	31474.2	31971.8	30715.7	31571.6	32616.1	31550.6	32974.5	32182.4	29801.1	30051.6	31798.5		28473.5	31722.1	33494.6	31251.6		24200.7	28130.3	26563.6		28386.9	48973.1	15871.6
Mg25		19697.5	23497.5	27825.6	20141.9		13852.2	13381.2	13774.8	17088.6	13875.2	15271	13534.2	20815.8	14691.8	9605.52	11086.3	13017.7	10046.5	10514.2	11623.2		7624.46	6825.2	8043.15	8471.77		15830.1	21560.3	16105.1		4230.68	4473.33	690.309
Al27		93900.6	94601.1	91331.6	99848.7		93343.5	92644	88095.1	92927.5	93379.4	94441.6	93926.8	98285.1	93848.2	84925.5	93155.3	93469	84975.4	88047.5	88081.6		81065.8	87284.4	88452.1	85487.1		97583.6	104074	102958		84096.6	179253	63293.1
Si29		244903	233168	220778	228304		252720	258131	255119	243268	252990	243731	257335	234354	252706	270368	259329	253785	249031	273479	275389		299406	269198	274008	282467		232486	216043	232135		277851	860181	317242
P31		1352.92	956.931	1402.19	1132.27		997.647	1027.64	1126.75	1246.72	1102.41	1093.64	966.882	982.784	1078.78	690.068	1026.15	1084.62	916.719	644.019	807.584		509.179	952.335	974.343	664.318		822.551	1316.75	1202.2		626.203	588.57	134.184
K39		21157.5	12476.8	8160.47	13085.2		23385.2	22021.8	21186.6	19493.8	21488.5	18282.3	21848.2	12089.2	25897.2	26641.7	25859.2	23768.3	30595.1	24890.5	25458.4		32147.9	37037.6	33371.5	29254.7		11517.2	7715.6	13858.1		35686.1	119808	48178.7
Ca42		44306	55445.2	60159.3	51291.4		40488.8	35446.6	34051.6	45482.4	38893.6	42292.7	35050	41780.3	37815.9	25592.5	36854.6	37591.4	24215.2	26286.4	29195.2		19832.7	22442.1	24846.3	24438.2		38066.7	60949	40115.7		14458.2	15550.8	3916.52
Sc45		17.2129	19.4908	23.3556	17.2585		15.0706	13.6089	14.1374	18.9315	12.6992	14.8902	12.7378	15.9564	16.682	8.94914	13.2861	15.6352	12.3876	9.14176	11.1099		6.68882	11.9805	11.7899	8.8737		24.421	18.5917	14.9633		6.12016	3.73884	1.44846
Ti49		6747.48	5862.59	6411.6	5585.98		5192.32	4762.43	5758.22	5850.3	4841.11	5171.65	4996.36	4756.27	5254.42	3602.35	5079.48	5438.48	4621.56	3535.25	3935.52		2424.46	4579.16	4954.16	3150.17		6553.68	6390.01	4729.77		3615.46	2586.81	585.178
V51		208.558	229.972	301.975	197.255		150.718	149.941	170.334	203.575	151.615	173.803	145.326	195.327	160.728	113.011	130.094	151.411	109.762	106.978	131.763		84.4062	85.5465	104.388	100.502		130.896	227.446	191.81		57.3868	109.864	27.1243
Cr53		90.31	110.258	136.91	35.0538		59.2819	60.2695	61.0157	61.1907	58.9343	52.7067	25.999	74.6551	63.5493	71.6232	48.8613	59.5153	52.0592	47.3022	67.5871		66.7269	55.675	68.2154	64.8943		60.6693	28.7432	14.3162		17.1544	67.831	22.3986
Mn55		772.8	1150.5	1076.26	756.776		701.635	629.719	809.358	865.181	733.002	837.806	663.347	939.007	797.08	663.727	709.936	767.624	893.21	564.275	741.879		309.88	727.442	903.815	432.339		481.774	1074.77	555.134		644.839	329.85	112.162
Fe57		49425.4	54955.3	60853.4	51643.2		35144	39940.8	41898.1	43460.3	40823.9	45870.7	37494.2	46445.7	39486.6	29145.5	31933.7	39589	32287.7	24998.9	31306.3		19254.9	25639.6	32528.6	23320.9		70340.8	51567.6	52222.8		18799.3	17124.6	5544.3
Co59		22.993	24.5179	30.2218	19.1086		12.9624	33.62	32.075	17.11	15.625	16.7287	13.8375	25.707	14.0184	9.86533	8.87084	26.7569	10.9711	10.2322	10.6768		28.9358	6.31857	30.4076	8.27182		26.9483	25.2869	22.3633		7.70592	13.6954	4.95406
Ni62		37.9821	57.8366	60.4794	28.7895		39.4011	34.0144	29.5492	34.27	28.6804	28.8307	18.3978	36.7977	22.071	38.5791	22.431	33.1131	29.5152	22.665	29.7202		30.1628	27.4041	32.5582	60.9032		24.4869	24.5445	22.3773		11.2666	33.1629	12.4881
Cu65		82.2326	95.1103	103.752	35.291		68.8268	61.2284	599.054	125.085	72.1535	75.8169	52.6176	44.9918	27.2784	41.4145	13.3633	93.6813	42.2918	53.661	97.1685		10.348	29.886	54.8442	44.2864		5.32483	72.1071	19.5149		7.99615	18.0479	9.57989
Zn66		76.0671	82.5795	91.7001	26.7302		48.7113	40.3115	63.2817	48.7026	59.2417	53.793	42.2669	48.3429	58.5175	71.3505	55.0714	62.3915	73.4325	38.7199	52.9978		30.9736	60.1038	97.2813	45.8096		43.8557	88.9465	55.3871		61.928	44.3516	14.3005
Ga71		20.0159	19.1131	20.4112	16.5602		18.1177	19.3381	18.7994	18.1545	19.2533	17.5174	17.8539	17.0933	18.7409	16.3111	17.3198	18.9203	17.3907	15.7171	17.1252		13.9383	17.2744	18.5605	15.7228		18.5624	19.0472	18.7486		16.5028	26.5512	9.615
Ge73		3.83103	3.59824	4.55098	3.27057		4.48895	7.93733	4.51016	3.86213	3.95099	8.0478	3.56677	5.22659	5.43027	5.55259	6.3739	5.19856	5.33594	4.23717	4.9771		7.49339	5.63954	6.05033	10.0861		3.85584	3.3896	3.59216		4.08978	12.1265	5.19977
Rb85		88.2495	39.82	28.2502	34.2627		75.565	101.263	80.3358	64.4478	83.18	72.4338	97.7974	37.2696	100.99	109.697	74.6591	94.4825	127.881	102.768	104.945		117.437	165.229	162.31	114.052		55.7132	23.4141	79.6196		160.14	353.037	131.799
Sr88		609.685	689.083	810.364	643.739		466.921	536.924	471.15	576.064	577.03	539.921	532.311	696.568	503.279	420.386	439.256	466.931	386.672	478.136	522.464		426.331	319.674	321.077	475.862		451.144	819.404	634.193		254.027	541.371	121.657
Y89		17.7514	16.7465	16.7575	17.8652		22.279	19.2032	16.1531	21.4596	16.2523	19.9084	18.465	12.1519	23.4331	13.3638	22.1293	22.5294	21.029	13.4347	15.6792		8.28076	27.7286	26.0828	13.8404		22.2003	15.0977	11.1536		16.8095	6.95045	4.14102
Zr90		277.902	117.722	84.7743	92.7717		187.82	214.487	250.97	186.052	221.505	206.941	234.021	104.676	197.818	196.03	268.602	263.792	292.166	201.102	213.267		132.403	397.777	347.125	199.513		134.494	54.3489	109.014		394.054	140.216	92.9568
Nb93		6.75843	4.88555	2.71005	4.80426		8.76425	8.13704	8.77756	7.78998	6.37795	6.74385	7.65191	3.57823	8.78644	6.63433	9.18708	9.99776	10.5093	6.73696	7.3969		5.4409	13.6575	12.484	7.36477		4.05154	3.2814	3.89902		11.3581	5.93103	1.25522
Mo95		1.46718	2.57311	2.40955	2.44854		2.94421	3.23356	2.07764	2.0351	2.4078	3.17487	1.42737	2.679	2.65527	2.88798	3.10798	4.38257	2.93799	2.74458	2.34441		6.17043	3.27317	3.74829	5.10547		2.11949	2.57651	2.14732		3.02673	6.8191	2.71761
Sn118		130.618	156.139	177.795	2.30153		175.788	172.857	152.953	138.768	149.522	167.912	3.14953	174.74	155.02	134.407	165.652	136.79	119.898	2.62541	133.342		146.907	172.209	139.398	164.577		140.028	2.32614	2.50175		3.0146	5.11823	1.68129
Sb121		0.756133	0.852906	0.521798	0.599158		0.692068	0.88601	0.517974	0.723962	0.407869	1.01309	0.586464	0.603398	0.79792	0.789225	0.603394	0.924527	1.08167	0.286391	0.97491		1.40407	1.09275	1.68506	1.51605		0.533653	0.36797	0.456977		1.18728	1.13732	0.840221
Cs133		3.81443	2.10142	2.96037	0.656035		1.61163	3.48917	3.56317	1.24719	3.28352	2.9082	4.05168	2.73594	3.08686	5.89168	1.43491	2.62052	2.93035	5.93062	2.43477		2.59121	3.82392	5.65832	4.27669		5.03562	1.25065	4.15157		4.13813	7.77162	3.26722
Ba137		643.832	461.795	323.767	412.98		522.307	504.292	937.501	504.908	528.826	434.517	516.275	368.01	581.36	632.944	522.691	471.51	598.447	605.725	559.371		692.908	665.896	563.829	684.706		277.81	320.199	315.505		676.4	2104.81	163.163
La139		20.6128	15.6261	16.4812	15.1092		23.1035	25.1603	24.1765	22.7263	22.05	21.3522	22.4349	13.7196	24.107	20.8432	22.995	23.9602	19.7248	22.0755	25.0919		22.0483	33.6345	30.1924	21.923		23.7317	14.5733	14.5669		52.2861	23.1593	14.352
Ce140		46.5655	34.801	38.0881	32.9868		52.3353	52.4554	53.8718	50.3408	48.209	47.8902	48.557	28.0832	55.263	42.6767	53.1298	56.2813	45.0304	44.9129	51.1441		39.8526	76.1138	67.6216	45.9082		55.4992	31.7367	29.1993		102.613	34.6363	24.8894
Pr141		6.26091	4.57101	5.27371	4.45597		6.72093	6.37245	6.50459	6.52402	5.98817	6.2997	6.09889	3.61455	7.2874	5.35057	6.45767	7.24495	5.50572	5.08382	6.27933		4.26142	9.31247	8.11225	5.27111		7.4746	4.37628	3.64998		11.5854	3.79243	2.615
Nd146		25.098	18.4194	22.3746	19.7095		27.0228	26.3444	27.6911	27.8929	24.7312	24.8293	25.4655	15.2695	28.1022	20.1845	28.2679	27.5258	23.4967	21.1927	25.1622		16.3318	38.1038	32.6369	20.7346		32.25	20.1156	16.3559		41.993	13.9148	8.64047
Sm147		5.71295	4.18934	5.03639	4.73108		6.47589	5.395	5.2138	6.27275	5.03964	5.38142	4.96269	3.33504	6.51886	3.864	6.00133	5.71467	6.14795	4.117	4.23881		2.76073	6.94796	6.2377	2.99841		7.07844	4.33292	3.12726		5.53076	2.03363	1.37218
Eu151		1.27559	1.22665	1.4125	1.22862		1.0948	1.11307	1.36148	1.38992	1.06005	1.3541	1.10988	1.07777	1.42081	1.00149	1.08218	1.1631	1.15116	0.883568	1.1667		0.702861	1.29857	1.10193	0.870822		1.87277	1.22952	1.06371		1.08594	0.818739	0.405053
Gd157		4.39637	3.60297	4.27319	4.04509		5.20678	4.28633	4.57777	4.59206	4.26582	3.75073	4.3592	2.95035	5.18826	2.81224	5.31986	3.85292	4.28955	2.86376	4.17116		2.14234	5.8979	6.11188	2.60615		5.44716	3.82381	2.62496		4.03626	2.20834	1.02525
Tb159		0.605821	0.611492	0.588904	0.585712		0.733241	0.600123	0.537742	0.76477	0.461979	0.677681	0.519094	0.390559	0.780783	0.457909	0.536973	0.704751	0.68159	0.436366	0.470014		0.175641	0.762774	0.741386	0.35212		0.803144	0.512968	0.426024		0.565791	0.247559	0.123186
Dy163		3.73954	3.56101	3.16613	3.63855		4.10203	2.99811	3.27886	4.02713	2.80841	3.33436	3.14703	2.69051	3.88615	2.4388	4.22806	3.92705	4.09687	1.9947	2.56725		1.63052	5.38453	5.14186	2.51556		5.65796	2.81563	2.00991		3.00186	0.836397	0.635432
Ho165		0.687606	0.680892	0.674793	0.704739		0.921095	0.6147	0.570164	0.819205	0.60436	0.718435	0.629746	0.612347	0.832665	0.470948	0.712283	0.830369	0.641437	0.496554	0.536684		0.235341	1.35758	0.907467	0.582616		0.982936	0.521017	0.443481		0.555583	0.207334	0.129638
Er167		2.12876	1.34976	1.50343	2.04531		2.16725	2.51341	1.7711	2.52581	1.8107	2.06721	1.97003	1.54112	2.64436	1.27384	2.34957	2.37619	1.86698	1.3295	1.85675		1.15847	2.21775	3.23998	1.56405		2.38171	1.64365	1.12623		2.00324	0.675684	0.58586
Tm169		0.257249	0.263921	0.245139	0.253413		0.425079	0.298518	0.233436	0.291027	0.254029	0.271674	0.293318	0.255859	0.396089	0.227938	0.29174	0.380742	0.308603	0.220313	0.312738		0.175449	0.420499	0.355964	0.222147		0.353796	0.222903	0.163175		0.26386	0.130558	0.120539
Yb173		1.50641	1.83034	1.65142	1.88276		2.58675	1.56418	1.44775	2.71225	1.21348	2.76103	1.94086	1.17022	2.29603	1.77127	2.01236	2.54316	2.36043	1.34315	1.87001		1.40942	2.79672	3.07717	1.59502		2.47691	1.14967	1.20562		1.69928	1.07394	0.756049
Lu175		0.285469	0.222338	0.225369	0.29657		0.366601	0.247293	0.271751	0.317828	0.237411	0.29013	0.321766	0.211171	0.456986	0.214228	0.341917	0.353699	0.3149	0.206164	0.326525		0.370324	0.437575	0.474956	0.400049		0.340767	0.189195	0.134922		0.291361	0.141862	0.228001
Hf178		7.08624	2.99089	2.79499	2.59719		5.88992	5.6417	7.23993	5.18391	5.61325	5.22248	6.59548	3.48804	5.16874	5.91203	7.44561	7.68851	8.684	5.62642	6.58085		3.46479	10.7358	9.51823	4.86357		3.44014	1.58428	3.08016		11.557	4.38524	4.30127
Ta181		0.433858	0.344191	0.222839	0.344018		0.63638	0.492612	0.682559	0.527721	0.396943	0.49792	0.463714	0.30929	0.58742	0.466514	0.610587	0.571727	0.730983	0.492112	0.486754		0.445362	0.907328	0.767643	0.51663		0.238495	0.176211	0.215464		0.766183	0.631487	0.127591
W182		0.872905	8.51496	0.988063	0.487186		1.28844	162.638	148.06	1.02994	6.59006	1.54407	0.935346	65.1695	2.6126	2.52331	1.35543	106.801	3.83471	1.32772	3.46046		170.748	3.46642	167.925	2.39398		103.77	0.748475	1.24801		1.64676	1.54299	0.895915
Tl205		0.265881	0.218014	0.09178	0.0881383		0.256277	0.207149	0.0947023	0.275495	0.275243	0.178961	0.116036	0.156488	0.271759	0.224571	0.62003	0.235026	0.228986	0.115643	0.307628		0.630073	0.166493	0.196523	0.562586		0.20599	0.0512353	0.0942158		0.180393	0.475812	0.325518
Pb208		9.03554	6.91238	8.42839	6.48285		11.5703	8.61451	12.5437	7.79668	8.49229	7.88928	10.028	12.0105	14.9312	13.6597	21.9543	13.5967	23.5044	12.0817	12.8801		10.9412	20.6519	27.9854	14.0935		6.448	12.4479	9.97969		17.1447	19.071	8.8725
Bi209		0.404035	0.64323	0.329071	0.29822		0.389665	2.08591	1.33702	0.407071	1.79935	1.43787	0.430145	0.502121	0.30389	1.53756	0.259192	2.16853	1.52588	0.167931	0.441473		0.539332	0.509708	4.04938	0.534592		1.45931	0.324796	0.188117		0.392837	1.04163	0.26597
Th232		7.83081	4.79671	5.44454	7.07369		13.8662	13.5064	10.9537	11.206	10.8646	10.3867	13.2719	4.14799	14.1713	13.0396	15.3327	13.6163	15.48	14.7662	16.5819		15.2653	23.4266	18.7637	16.4371		4.85134	2.46234	4.1913		29.0002	60.714	59.189
U238		2.10609	1.48301	1.726	1.6139		3.86894	4.04635	3.99107	3.11175	3.06623	2.86792	3.66828	1.01301	3.60904	4.13114	4.15176	1.6854	5.72034	4.31616	4.56117		5.10453	6.50616	6.18161	3.69725		0.64797	0.785635	1.22012		5.91664	12.2156	12.1562
(*) Location in UTM coordinates (UTM 19S / Datum: WGS84)
(**) Altitude in meters above sea level
Payacán, I., Gutiérrez, F., Bachmann, O., and Parada, M.Á., 2023, Differentiation of an upper crustal magma reservoir via crystal-melt separation recorded in the San Gabriel pluton (central Chile): Geosphere, v. 19, https://doi.org/10.1130/GES02535.1
